# Supplementary material for: Nanoengineered mitochondria enable ocular mitochondrial disease therapy via the replacement of dysfunctional mitochondria
Source: PubMed Central journal article supplement — Acta Pharm Sin B. 2024 Aug 13;14(12):5435–50. doi: 10.1016/j.apsb.2024.08.007 (PMC11725173; doi:10.1016/j.apsb.2024.08.007), 2024-08-13
Supplement: mmc1.pdf [file mmc1.pdf]

## Supporting Information for

# Nanoengineered mitochondria enable ocular mitochondrial disease therapy *via* the replacement of dysfunctional mitochondria

Yi Wang<sup>a,†</sup>, Nahui Liu<sup>a,†</sup>, Lifan Hu<sup>a,†</sup>, Jingsong Yang<sup>a</sup>, Mengmeng Han<sup>a</sup>, Tianjiao Zhou<sup>a</sup>, Lei Xing<sup>a,\*</sup>, Hulin Jiang<sup>a,b,\*</sup>

<sup>a</sup>*State Key Laboratory of Natural Medicines, China Pharmaceutical University, Nanjing, 210009, China*

<sup>b</sup>*College of Pharmacy, Yanbian University, Yanji, 133002, China*

\*Corresponding authors. Tel./fax: +86 025 83271027 (Hulin Jiang, Lei Xing). E-mail addresses: [jianghulin3@163.com](mailto:jianghulin3@163.com) (Hulin Jiang), [xinglei6xl@163.com](mailto:xinglei6xl@163.com) (Lei Xing).

<sup>†</sup>These authors made equal contributions to this work.

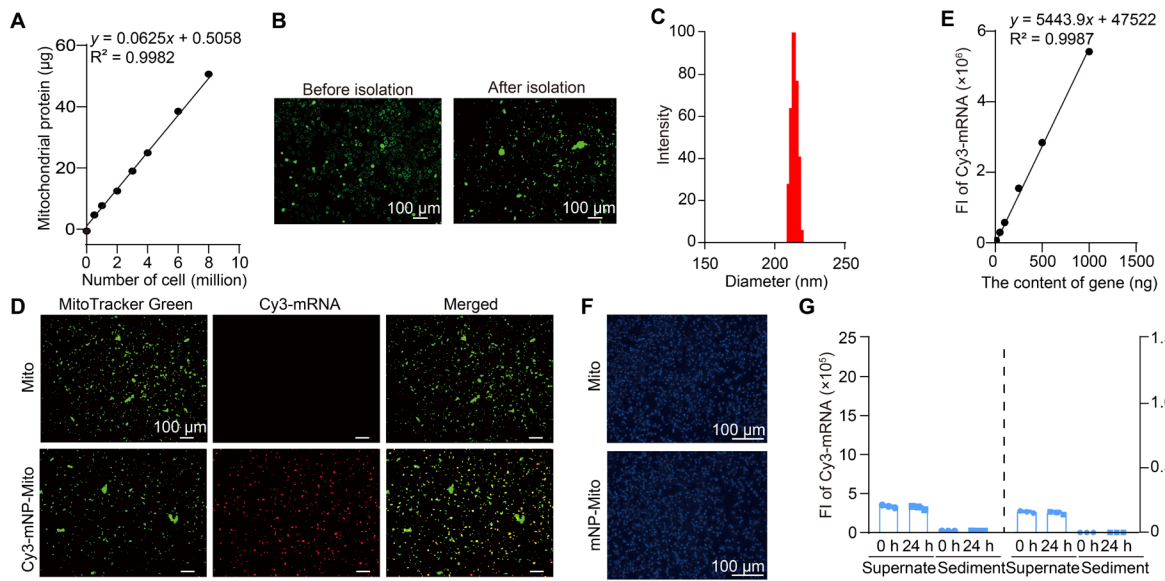

**Figure S1** The characteristics of mNP-Mito. (A) The standard curve of mitochondrial proteins and the number of donor cells; (B) Before isolation from donor cells and after isolation in a culture dish, the mitochondrial mass was detected by MitoTracker Green probe; (C) The nanoparticle size of mNP; (D) The binding of Cy3-mNP to extracted mitochondria checked by the colocalization of green-labeled mitochondria and red-labeled mRNA; (E) The relationship between fluorescence intensity (FI) of Cy3-mRNA and the contents of mRNA; (F) The mitochondrial activity before and after binding with mNP detected by Janus green-B dye; (G) FI of Cy3-mRNA was used to investigate the stability of mNP-Mito at different times.

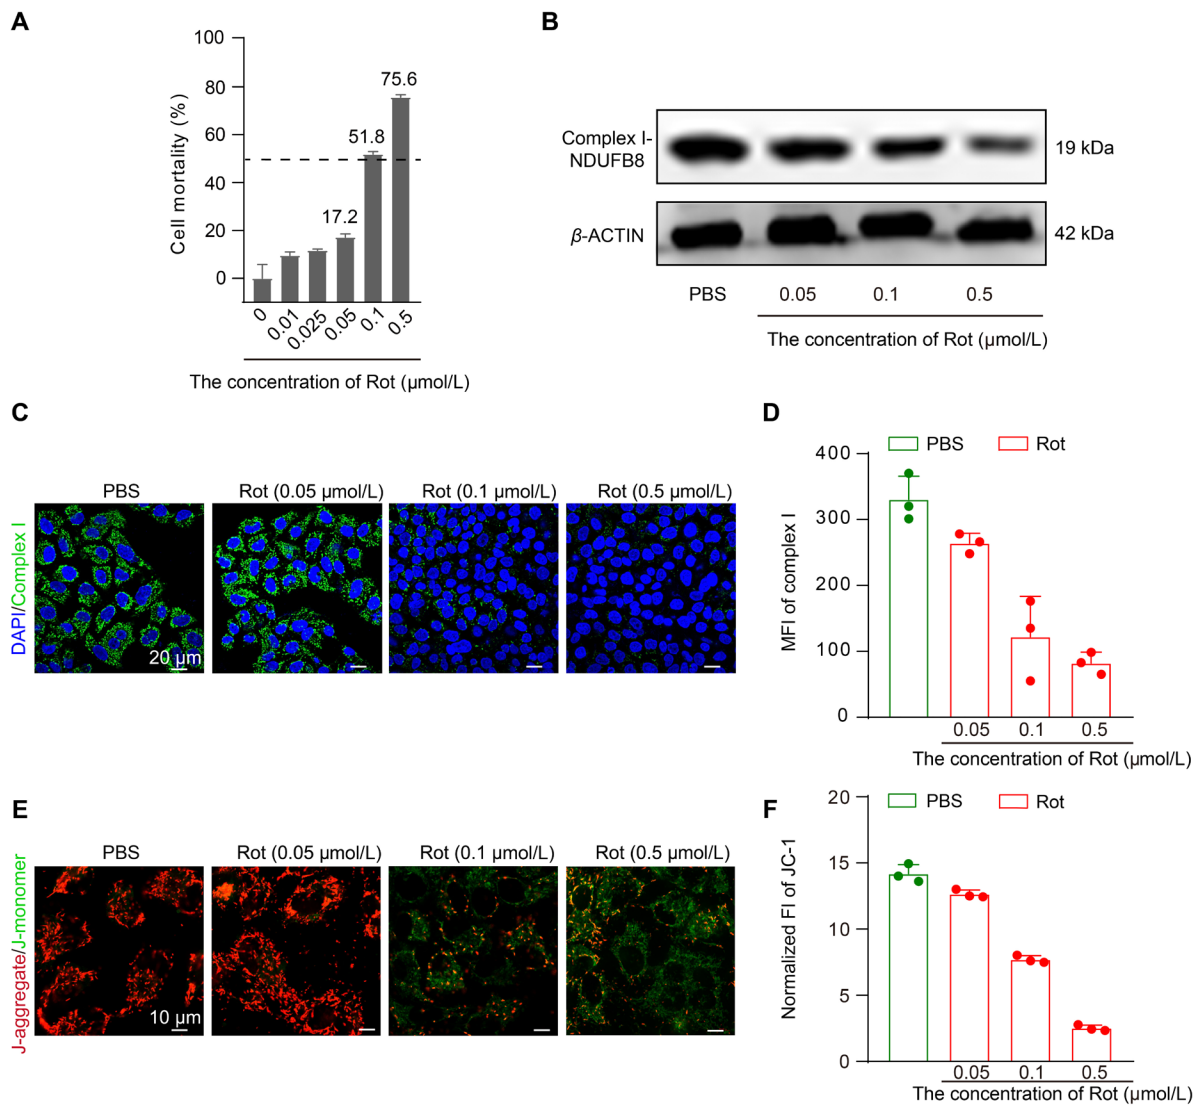

**Figure S2** Impairment of mitochondrial complex I tightly correlates with Rot concentrations in the Rot-induced cell model. (A) The relationship between Rot concentration and cell mortality; (B) The expression of mitochondrial protein NDUFB8 was evaluated under different concentrations of Rot *in vitro*; (C, D) Decreasing complex I contents detected by CLSM (C) and flow cytometry of extracted mitochondria (D); (E, F) The changes in MMP detected by CLSM (E) and multifunctional microplate reader (F), normalized FI = FI/cellular whole-protein contents. In (A), (D), and (F), data are mean  $\pm$  SD ( $n = 3$ ).

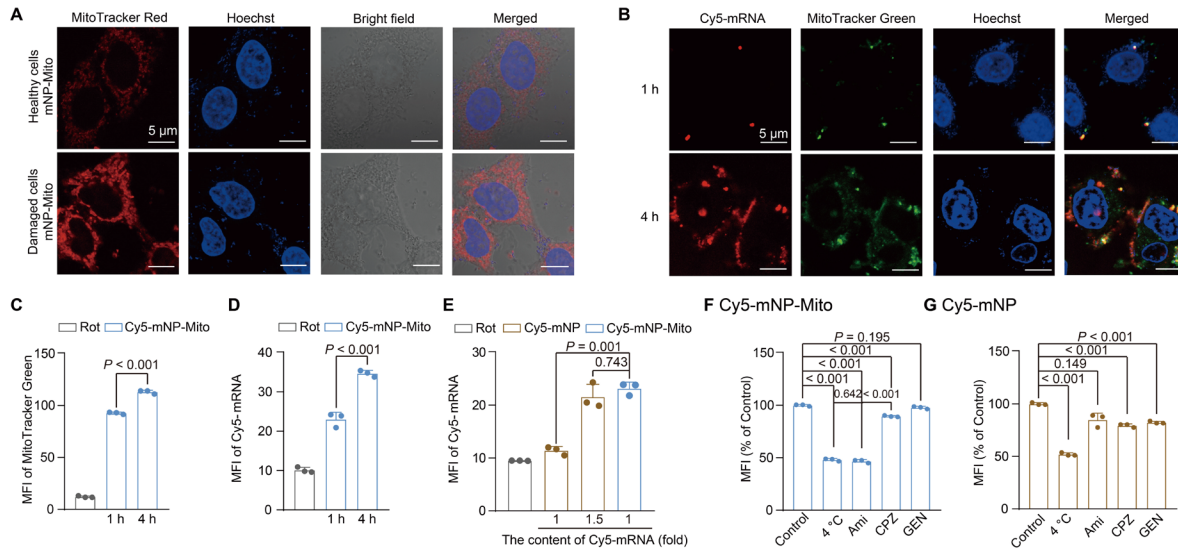

**Figure S3** The cellular uptake of mNP-Mito. (A) The cellular uptake of exogenous mitochondria in normal HeLa cells and Rot-damaged cells (24 h); (B–D) The cellular uptake of MitoTracker Green-labeled Cy5-mNP-Mito after different treatment times detected by CLSM (B) and flow cytometer (C, D); (E) The cellular uptake of Cy5-mNP-Mito after different treatments at 4 h detected by flow cytometer; (F, G) The cellular endocytosis pathway studies of Cy5-mNP-Mito (F) and Cy5-mNP (G). Data are shown as mean  $\pm$  SD ( $n = 3$  in C–G). Statistical significance was analyzed by one-way ANOVA with the Tukey’s honest significant difference (HSD) post hoc test (C, D, F) and Games-Howell test (E, G).

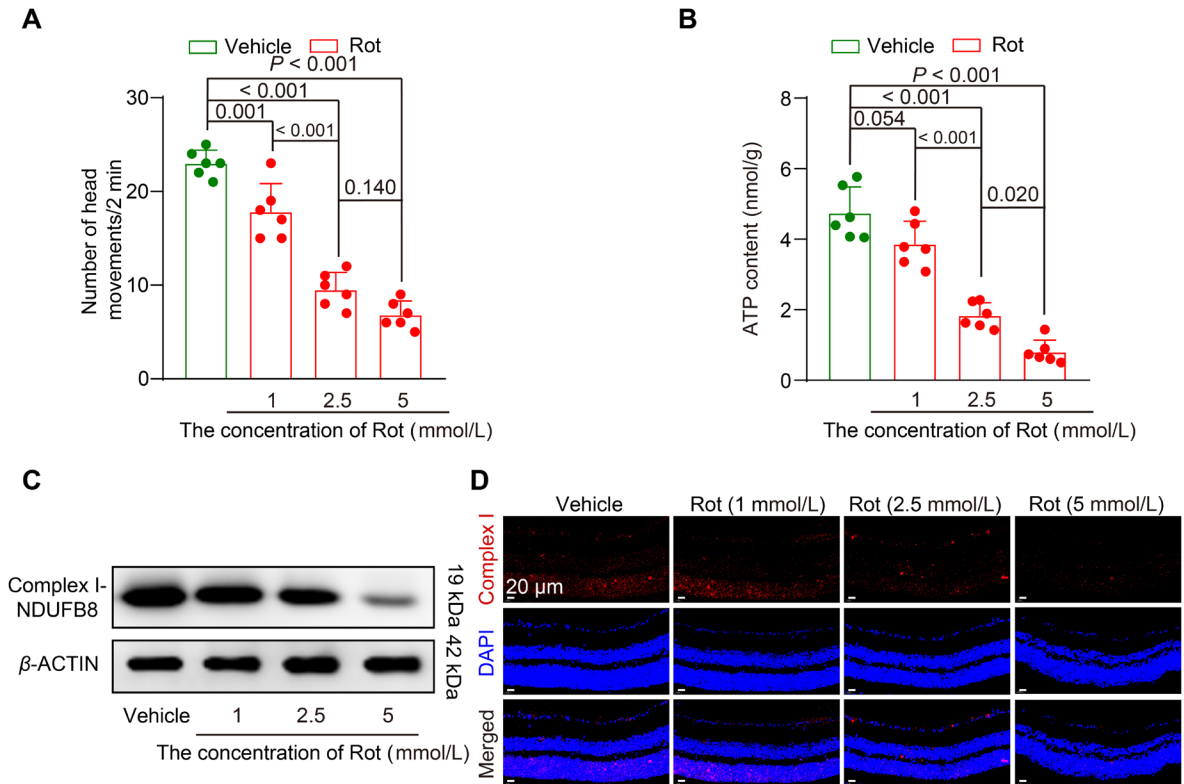

**Figure S4** Impairment of mitochondrial complex I tightly correlates with disorder severity in the Rot-induced experimental LHON-like mouse model. (A) The optomotor test and counting the number of head movements following different Rot concentrations; (B) ATP contents in retina after treatment with different concentrations of Rot; (C) The expression of mitochondrial protein NDUFB8 located in mitochondrial complex I after Rot treatment; (D) The contents of complex I detected by immunofluorescence staining after Rot treatment. Data are shown as mean  $\pm$  SD ( $n = 6$  in A, B). Statistical significance was analyzed by one-way ANOVA with the Tukey's honest significant difference (HSD) post hoc test (A, B).

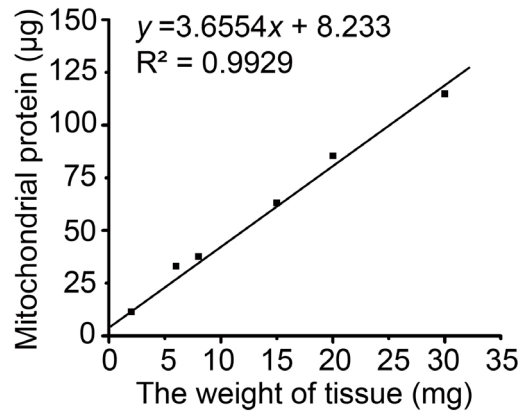

**Figure S5** The standard curve between the weight of Balb/c mouse heart tissues and the contents of mitochondrial proteins.

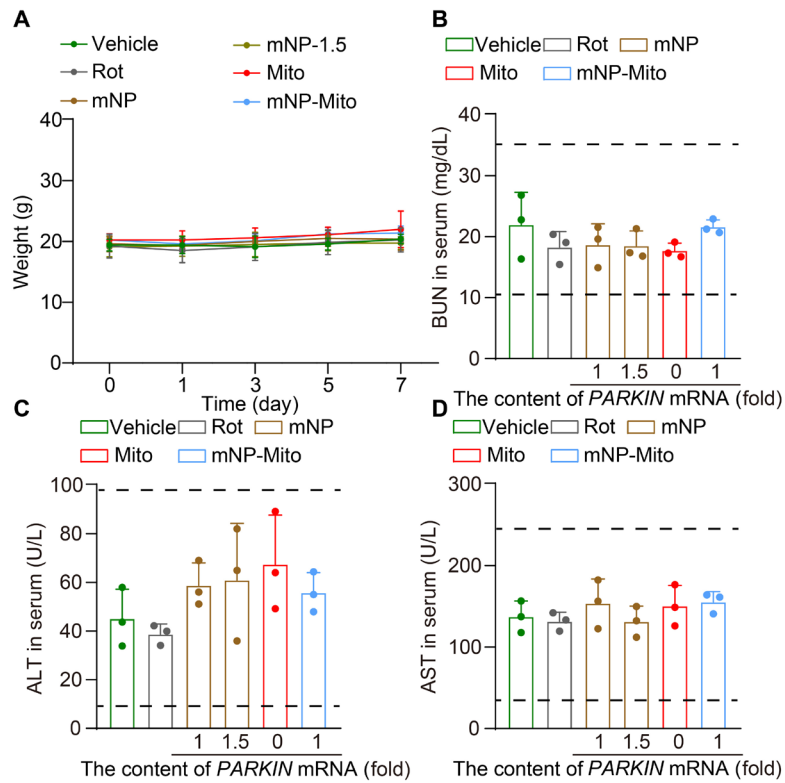

**Figure S6** The safety of mNP-Mito in Rot-induced mice model. (A) The weight change in different formulation treatments; (B–D) The detection of blood urea nitrogen (BUN, B), alanine transaminase (ALT, C), and aspartate aminotransferase (AST, D) in serum after Day 7 of treatments, error bars: mean  $\pm$  SD ( $n = 7$  per group in A,  $n = 3$  mice per group in B–D). The dashed area represents the normal range of the indicator.

**Table S1** The organ indexes of the normal Balb/c mice in PBS, Low-dose (1-fold mNP-Mito), Mid-dose (2-fold mNP-Mito) and High-dose (4-fold mNP-Mito) groups after Day 14 treatments (intravitreal administration, organ index = organ/body weight  $\times$  100),  $n = 6$  in the PBS, Low-dose and Mid-does groups,  $n = 5$  in the High-dose group. Statistical significance was measured using one-way ANOVA with the Scheffe or Games-Howell test. Each group was compared with the PBS group, with a  $P > 0.05$ . Except for PBS (liver) *versus* High-dose (liver) group,  $P = 0.022$ ; and PBS (liver) *versus* Mid-dose (liver) group,  $P = 0.045$ . Error bars: mean  $\pm$  SD.

| Organ  | PBS             | Low-dose group  | Mid-dose group  | High-dose group |
|--------|-----------------|-----------------|-----------------|-----------------|
| Heart  | 0.49 $\pm$ 0.06 | 0.48 $\pm$ 0.02 | 0.48 $\pm$ 0.07 | 0.49 $\pm$ 0.04 |
| Liver  | 4.33 $\pm$ 4.25 | 4.84 $\pm$ 0.21 | 4.88 $\pm$ 0.23 | 4.97 $\pm$ 0.44 |
| Spleen | 0.51 $\pm$ 0.08 | 0.59 $\pm$ 0.06 | 0.56 $\pm$ 0.04 | 0.57 $\pm$ 0.12 |
| Lung   | 0.70 $\pm$ 0.07 | 0.79 $\pm$ 0.04 | 1.11 $\pm$ 0.90 | 0.74 $\pm$ 0.08 |
| Kidney | 1.44 $\pm$ 0.13 | 1.58 $\pm$ 0.06 | 1.58 $\pm$ 0.06 | 1.39 $\pm$ 0.14 |



**Table S2** The hematological parameters of the mice in various groups after different treatments in the LHON mice model. Error bars: mean  $\pm$  SD ( $n = 3$  mice per group).

| –      | Vehicle            | Rot                | mNP                | mNP-1.5            | Mito               | mNP-Mito           | Reference     |
|--------|--------------------|--------------------|--------------------|--------------------|--------------------|--------------------|---------------|
| WBC    | 5.50 $\pm$ 1.61    | 6.87 $\pm$ 5.05    | 4.57 $\pm$ 1.63    | 2.23 $\pm$ 1.60    | 3.33 $\pm$ 0.72    | 5.30 $\pm$ 1.57    | 0.80–6.80     |
| Lymph  | 3.57 $\pm$ 0.83    | 3.50 $\pm$ 2.17    | 3.30 $\pm$ 1.39    | 1.63 $\pm$ 1.14    | 2.50 $\pm$ 0.66    | 3.90 $\pm$ 1.30    | 0.70–5.70     |
| Gran   | 1.30 $\pm$ 0.17    | 1.30 $\pm$ 0.44    | 1.03 $\pm$ 0.31    | 0.53 $\pm$ 0.42    | 0.73 $\pm$ 0.23    | 1.23 $\pm$ 0.59    | 0.10–1.80     |
| Lymph% | 65.33 $\pm$ 3.11   | 62.17 $\pm$ 9.51   | 70.40 $\pm$ 7.57   | 73.07 $\pm$ 1.07   | 75.40 $\pm$ 6.56   | 72.93 $\pm$ 9.78   | 55.80–90.60   |
| Mon%   | 5.13 $\pm$ 0.40    | 6.47 $\pm$ 3.32    | 6.10 $\pm$ 3.77    | 3.67 $\pm$ 0.32    | 3.47 $\pm$ 1.01    | 3.93 $\pm$ 1.72    | 1.80–6.00     |
| Gran%  | 29.20 $\pm$ 3.33   | 31.37 $\pm$ 10.37  | 23.50 $\pm$ 3.80   | 23.27 $\pm$ 1.01   | 21.13 $\pm$ 5.61   | 23.13 $\pm$ 8.17   | 8.60–38.90    |
| HGB    | 141.67 $\pm$ 10.01 | 146.33 $\pm$ 24.17 | 148.67 $\pm$ 4.04  | 137.33 $\pm$ 6.35  | 140.67 $\pm$ 16.04 | 134.00 $\pm$ 3.00  | 110.00–143.00 |
| HCT    | 39.90 $\pm$ 2.69   | 34.97 $\pm$ 2.06   | 39.93 $\pm$ 4.53   | 37.23 $\pm$ 4.46   | 35.30 $\pm$ 3.05   | 35.73 $\pm$ 2.93   | 34.60–44.60   |
| MCHC   | 319.33 $\pm$ 17.16 | 347.00 $\pm$ 22.61 | 333.33 $\pm$ 30.50 | 337.33 $\pm$ 21.08 | 332.67 $\pm$ 19.66 | 313.00 $\pm$ 12.49 | 302.00–353.00 |

WBC: white blood cells; Lymph: lymphocytes; Gran: granulocytes; Lymph%: lymphocyte percentage; Mon%: monocyte percentage; Gran%: granulocyte percentage; HGB: hemoglobin; HCT: hematocrit; MCHC: mean corpuscular hemoglobin concentration.
